# Supplementary material for: Osteogenesis of Multipotent Progenitor Cells using the Epigallocatechin Gallate-Modified Gelatin Sponge Scaffold in Rat Congenital Cleft-Jaw Model
Source: Preprints.org preprint supplement (doi:10.20944/preprints201811.0212.v1), 2018-11-08
Supplement: Supplementary file 1 [file supplementary]

# Supplementary Materials: Osteogenesis of Multipotent Progenitor Cells using the Epigallocatechin Gallate-Modified Gelatin Sponge Scaffold in Rat Congenital Cleft-Jaw Model.

*Satoshi Sasayama, Tomoya Hara, Tomonari Tanaka, Yoshitomo Honda, and Shunsuke Baba.*

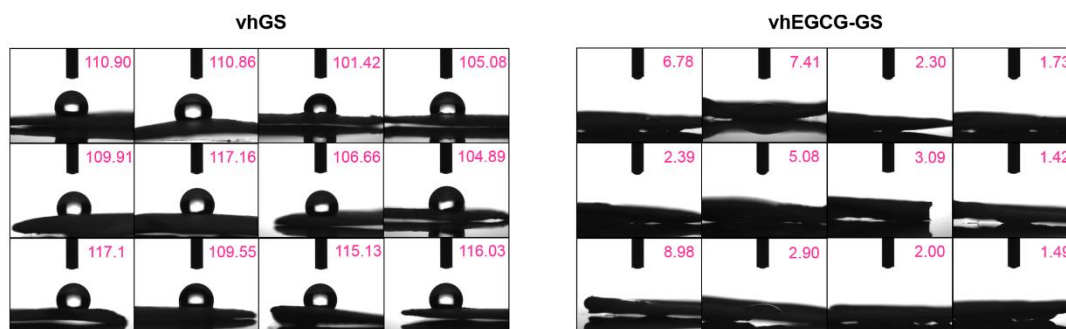

Figure S1. Water wettability of the membrane prepared from vhEGCG-GS and vhGS. All 24 samples are shown.

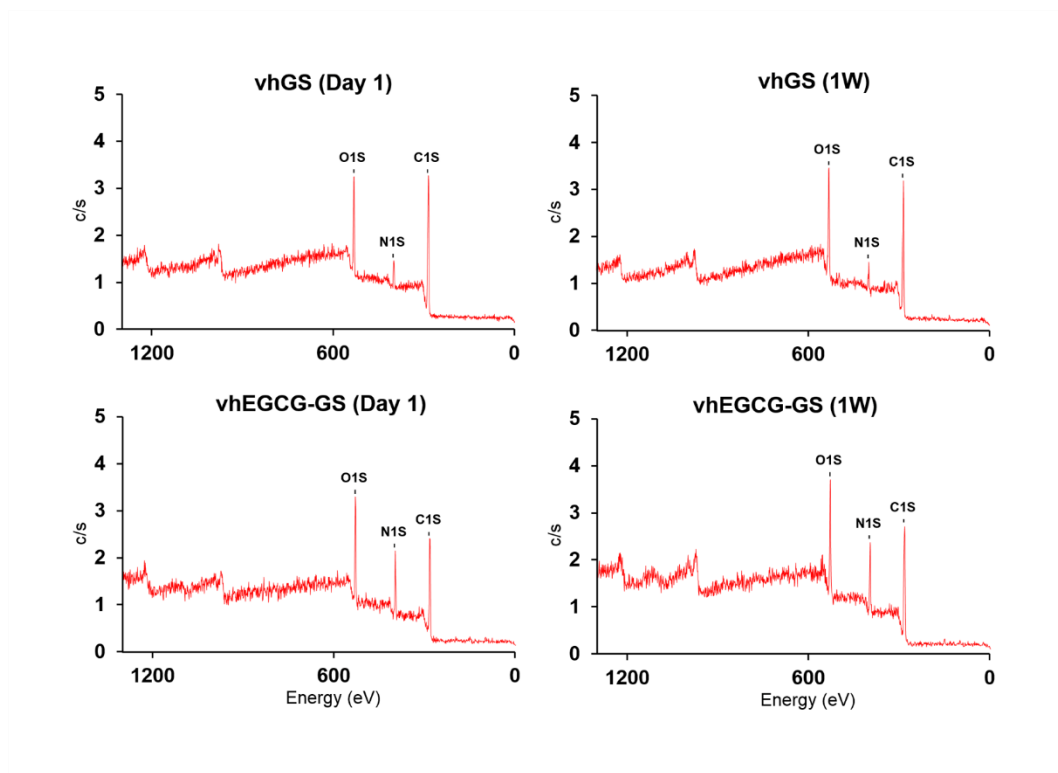

Figure S2. X-ray photoelectron spectroscopy spectra of vhEGCG-GS and vhGS immersed in the Dulbecco's modified essential medium for 1 day or 1 week.
